# Supplementary material for: Solid-state structural transformations in metal organic-inorganic hybrids constructed from terbium(iii) complexes and iodocuprate clusters
Source: Royal Society of Chemistry journal article supplement (doi:10.1039/c2ce25120e), 2012-01-01
Supplement: c2ce25120e.pdf [file c2ce25120e.pdf]

## **Supplementary Information**

### **Solid-state structural transformations in metal organic-inorganic hybrids constructed from terbium(III) complexes and iodocuprate clusters**

**Shashank Mishra<sup>\*a</sup>, Erwann Jeanneau<sup>b</sup>, Gilles Ledoux<sup>c</sup> and Stéphane Daniele<sup>\*a</sup>**

<sup>a</sup> Université Lyon 1, IRCELYON, 2 Avenue A. Einstein, 69626 Villeurbanne, France.

E-mail: [shashank.mishra@ircelyon.univ-lyon1.fr](mailto:shashank.mishra@ircelyon.univ-lyon1.fr); Fax : +33 472445399; Tel: +33 472445322

<sup>b</sup> Université Lyon 1, Centre de Diffractométrie, 69622 Villeurbanne, France.

<sup>c</sup> Université Lyon 1, Laboratoire de Physico Chimie des Matériaux Luminescent,  
CNRS UMR 5620, 10 rue A. M. Ampère, 69622 Villeurbanne, France.

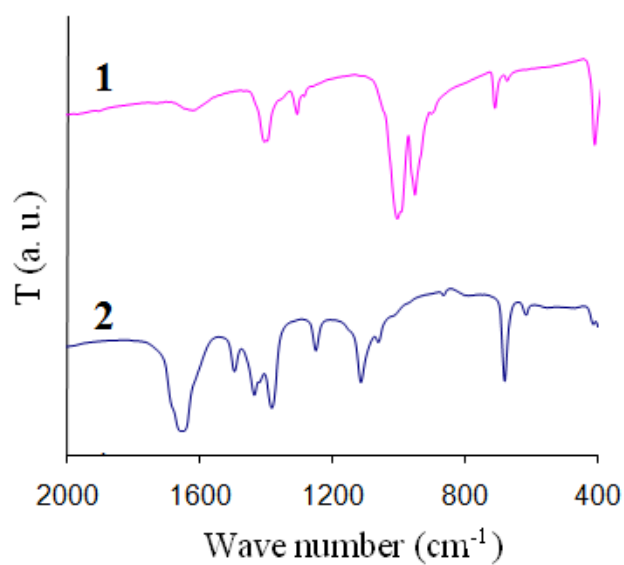

**Figure S1:** FT-IR spectra of **1** and **2**.

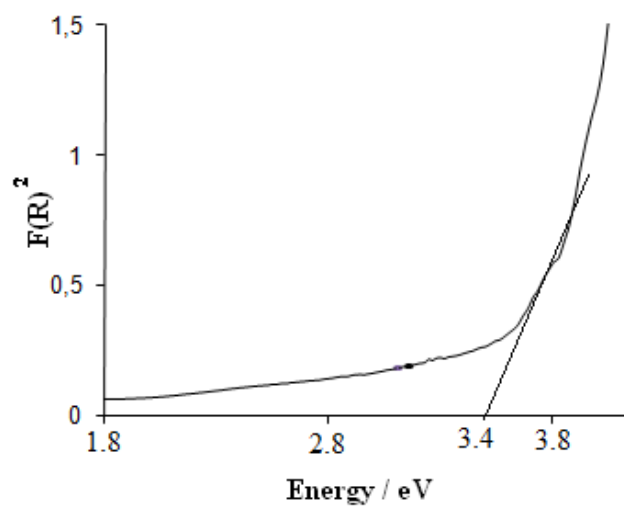

**Fig. S2:** Diffuse reflectance spectra of **1** in Kubelka-Munk unit. A band gap of about 3.4 eV reveals insulator nature of these hybrid iodocuprates.
